# Supplementary figures and images for: Non-innocent behaviour of ancillary and bridging ligands in homovalent and mixed-valent ruthenium complexes [A2Ru(µ-L)RuA2]n, A = 2,4-pentanedionato or 2-phenylazopyridine, L2−= 2,5-bis(2-oxidophenyl)pyrazine
Source: Royal Society of Chemistry journal article supplement (doi:10.1039/b701511a), 2007-01-01

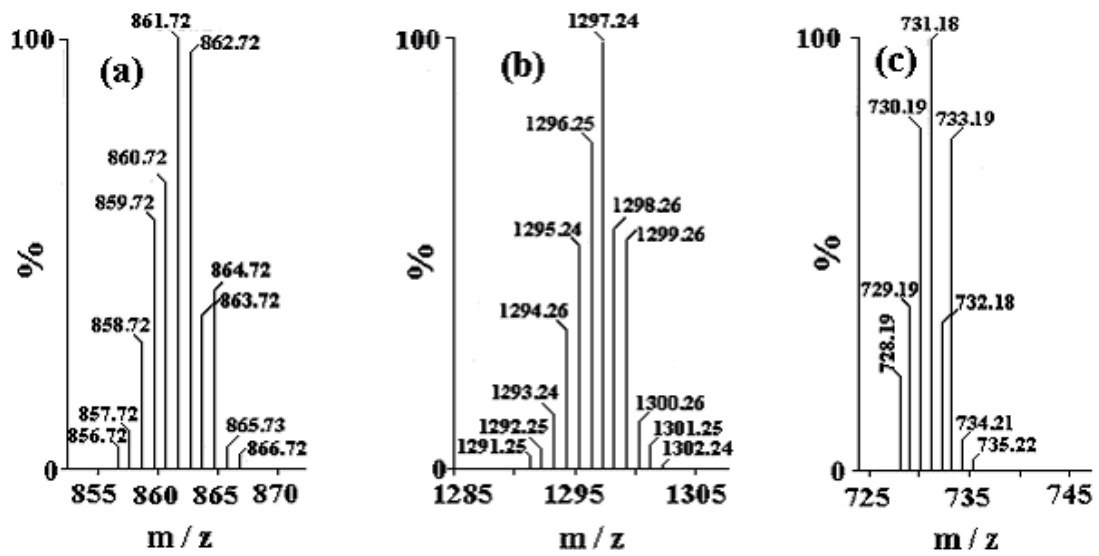

Fig.S1

Supplement: b701511a.pdf [file b701511a.pdf]
